# Supplementary material
Source: PubMed Central journal article supplement (PMC4238201)
Supplement: 11606_2014_2947_MOESM1_ESM.pdf [file 11606_2014_2947_MOESM1_ESM.pdf]

Online Appendix

**Characteristics and Long-term Follow-up of Participants with Peripheral Arterial Disease during ALLHAT**

Linda B. Piller, MD, MPH,<sup>1</sup> Lara M. Simpson, PhD,<sup>1</sup> Sarah Baraniuk, PhD,<sup>1</sup> Gabriel B. Habib, MD,<sup>2</sup> Mahboob Rahman, MD,<sup>3</sup> Jan N. Basile, MD,<sup>4</sup> Richard A. Dart, MD,<sup>5</sup> Allan J. Ellsworth, PharmD,<sup>6</sup> Herbert Fendley, MD,<sup>7</sup> Jeffrey L. Probstfield, MD,<sup>8</sup> Paul K. Whelton, MB., MD, MSc.,<sup>9</sup> Barry R. Davis, MD, PhD,<sup>1</sup> for the ALLHAT Collaborative Research Group<sup>10</sup>

Affiliations: <sup>1</sup>University of Texas School of Public Health, Houston, TX, <sup>2</sup>Michael E. DeBakey Veterans Affairs Medical Center, Houston, TX, <sup>3</sup>University Hospitals Case Medical Center, Louis Stokes Cleveland VA Medical Center, Case Western Reserve University Cleveland, OH, <sup>4</sup>Ralph H. Johnson Veterans Affairs Medical Center, Charleston, SC, <sup>5</sup>Marshfield Clinic Research Foundation, Marshfield, WI, <sup>6</sup>University of Washington, Seattle, WA, <sup>7</sup>AHEC Family Practice Center, Pine Bluff, AR, <sup>8</sup>University of Washington School of Medicine, Division of Cardiology, Seattle, WA, <sup>9</sup>Tulane University School of Public Health and Tropical Medicine, New Orleans, LA. <sup>10</sup>For a complete list of members of the ALLHAT Collaborative Research Group, see *JAMA* 2002;288:2981–2997.

**Corresponding Author:**

Linda B. Piller, MD, MPH  
The University of Texas School of Public Health  
1200 Herman Pressler St., W-906  
Houston, TX 77030  
Phone: 713-500-9507  
Fax: 713-500-9596  
Email: [Linda.B.Piller@uth.tmc.edu](mailto:Linda.B.Piller@uth.tmc.edu)

Key words: cardiovascular disease, hypertension, clinical trials,  
Clinical Trial Registration: [www.clinicaltrials.gov](http://www.clinicaltrials.gov) NCT00000542

**Online Appendix.** Annual medication and blood pressure status for participants with peripheral arterial disease.\*

|                                   | Clinical Peripheral Arterial Disease/Revascularization Present (+) /Absent (-) |                           |              |              |              |              |              |              |
|-----------------------------------|--------------------------------------------------------------------------------|---------------------------|--------------|--------------|--------------|--------------|--------------|--------------|
|                                   | Baseline                                                                       |                           | Year 1       |              | Year 3       |              | Year 5       |              |
|                                   | +                                                                              | -                         | +            | -            | +            | -            | +            | -            |
| Chlorthalidone                    |                                                                                |                           |              |              |              |              |              |              |
| n                                 | 402                                                                            | 14,600                    | 377          | 13,231       | 348          | 11,747       | 189          | 6,303        |
| BP in mm Hg, mean (SD)            |                                                                                |                           |              |              |              |              |              |              |
| Systolic                          | 148.1 (16.1)                                                                   | 146.2 (15.7)              | 139.1 (17.6) | 136.8 (15.8) | 137.0 (17.3) | 134.8 (15.4) | 135.9 (18.8) | 133.9 (15.1) |
| Diastolic                         | 81.3 (10.2)                                                                    | 84.1 (10.0)               | 76.6 (9.9)   | 79.4 (9.6)   | 74.0 (10.2)  | 77.3 (9.5)   | 72.5 (11.4)  | 75.5 (9.7)   |
| On atenolol, n (%)                | NA                                                                             | NA                        | 72 (19.1)    | 2,278 (17.2) | 101 (29.0)   | 2,858 (24.3) | 53 (28.0)    | 1,796 (28.5) |
| On any lipid-lowering drug, n (%) | 57 (11.2) <sup>†</sup>                                                         | 1,815 (12.3) <sup>†</sup> | 113 (30.0)   | 3,407 (25.8) | 131 (37.5)   | 3,848 (32.8) | 86 (45.5)    | 2,419 (38.4) |
| Mean # AHTs, (SD)                 | 1.00                                                                           | 1.00                      | 1.58 (0.8)   | 1.36 (0.7)   | 1.88 (1.1)   | 1.61 (0.9)   | 2.18 (1.1)   | 1.81 (1.0)   |
| Amlodipine                        |                                                                                |                           |              |              |              |              |              |              |
| n                                 | 198                                                                            | 8,700                     | 177          | 7,891        | 157          | 7,056        | 114          | 3,805        |
| BP in mm Hg, mean (SD)            |                                                                                |                           |              |              |              |              |              |              |
| Systolic                          | 148.9 (15.9)                                                                   | 146.1 (15.7)              | 139.8 (16.6) | 138.4 (14.9) | 139.3 (18.6) | 135.5 (15.2) | 136.8 (21.9) | 134.6 (14.7) |
| Diastolic                         | 81.1 (11.4)                                                                    | 84.0 (10.2)               | 75.3 (10.0)  | 78.8 (9.5)   | 74.5 (10.9)  | 76.4 (9.6)   | 72.6 (10.0)  | 74.7 (9.9)   |
| On atenolol, n (%)                | NA                                                                             | NA                        | 28 (15.8)    | 1,313 (16.6) | 29 (18.5)    | 1,673 (23.7) | 23 (20.2)    | 1,047 (27.5) |
| On any lipid-lowering drug, n (%) | 24 (9.1) <sup>†</sup>                                                          | 1,098 (12.5) <sup>†</sup> | 46 (30.0)    | 2,060 (26.1) | 59 (37.6)    | 2,311 (32.7) | 57 (50.0)    | 1,427 (37.5) |
| Mean # AHTs, (SD)                 | 1.00                                                                           | 1.00                      | 1.39 (0.8)   | 1.38 (0.7)   | 1.75 (0.9)   | 1.65 (0.9)   | 1.94 (1.1)   | 1.89 (1.0)   |
| Lisinopril                        |                                                                                |                           |              |              |              |              |              |              |
| n                                 | 230                                                                            | 8,674                     | 219          | 7,788        | 192          | 6,845        | 118          | 3,649        |
| BP in mm Hg, mean (SD)            |                                                                                |                           |              |              |              |              |              |              |
| Systolic                          | 147.3 (16.3)                                                                   | 146.3 (15.5)              | 140.5 (21.3) | 140.0 (18.4) | 135.7 (19.9) | 136.8 (17.4) | 132.6 (22.0) | 136.0 (17.8) |
| Diastolic                         | 81.2 (11.0)                                                                    | 84.2 (10.0)               | 77.3 (11.6)  | 80.0 (10.5)  | 73.9 (11.5)  | 77.5 (10.3)  | 73.8 (11.8)  | 75.5 (10.7)  |
| On atenolol, n (%)                | NA                                                                             | NA                        | 32 (14.6)    | 1,549 (19.9) | 39 (20.3)    | 1,689 (24.7) | 29 (24.6)    | 1,022 (28.0) |
| On any lipid-lowering drug, n (%) | 30 (9.6) <sup>†</sup>                                                          | 1,064 (12.2) <sup>†</sup> | 76 (34.7)    | 1,979 (25.4) | 89 (46.1)    | 2,183 (31.9) | 54 (45.8)    | 1,356 (37.1) |
| Mean # AHTs, (SD)                 | 1.00                                                                           | 1.00                      | 1.49 (0.9)   | 1.50 (0.8)   | 1.94 (1.1)   | 1.78 (1.0)   | 2.07 (1.1)   | 1.99 (1.2)   |

Abbreviations: AHTs = antihypertensives; BP= blood pressure; NA= Not Ascertained

\* Refers to documented hospitalized PAD or lower extremity PAD revascularization procedure

<sup>†</sup>At Baseline only pravastatin information was collected.

Baseline systolic blood pressure (SBP) ranged from 147.3 mm Hg in the lisinopril group to 148.9 mm Hg in the amlodipine group; diastolic BP (DBP) range was 81.1-81.3 mm Hg. In both the chlorthalidone and amlodipine groups, SBP was higher and DBP lower throughout in those with PAD compared with non-PAD participants. Those with PAD in the lisinopril group at year 5 had SBP 2-3 mm Hg lower than in the chlorthalidone and amlodipine groups. At year five, SBP was higher in non-PAD participants in the lisinopril compared with the chlorthalidone and amlodipine groups (136.0 mm Hg vs. 133.9 and 134.6, respectively). Mean number of antihypertensive medications was higher with PAD in chlorthalidone and amlodipine groups compared with non-PAD participants, and, by year 3, in those with PAD compared with non-PAD participants.
